# Supplementary material
Source: PubMed Central journal article supplement (PMC3593245)
Supplement: NIHMS443757-supplement-Supplementary_Figures.pdf [file NIHMS443757-supplement-Supplementary_Figures.pdf]

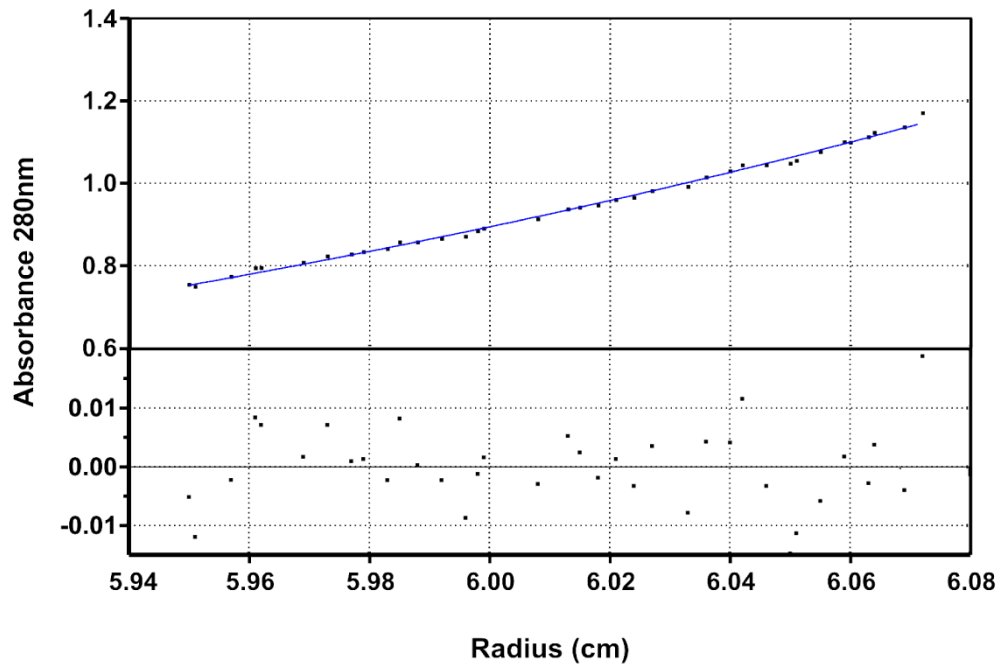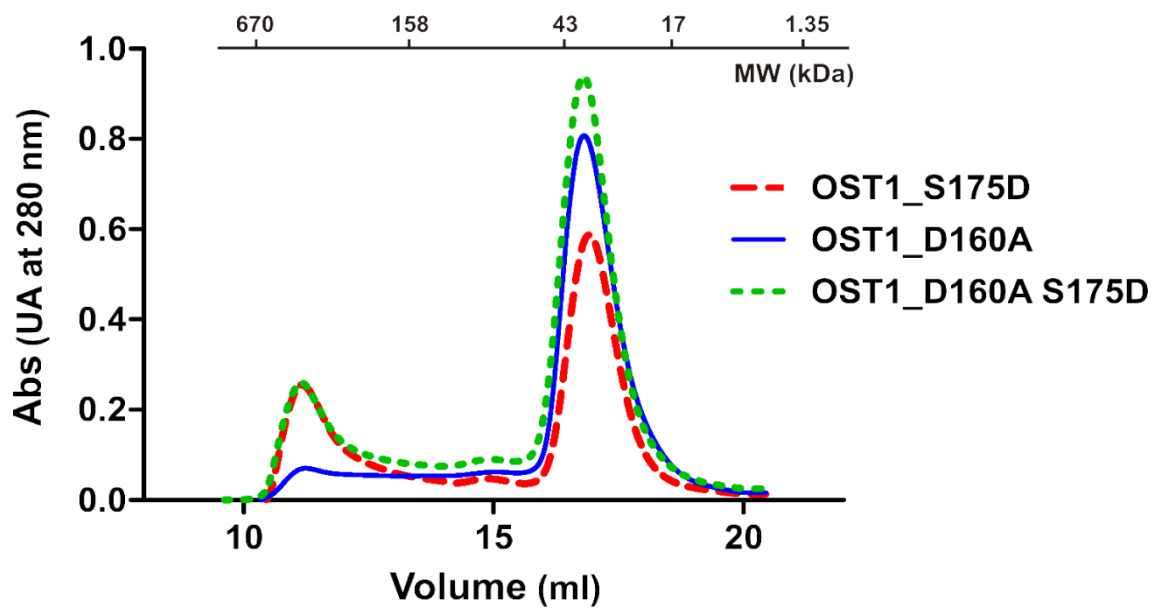

Supplementary Figure 1

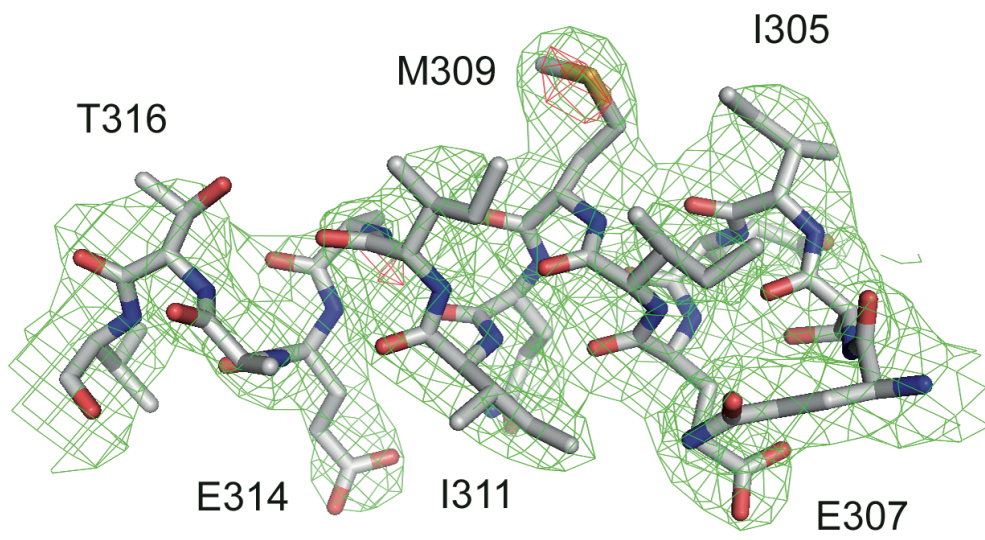

Supplementary Figure 2

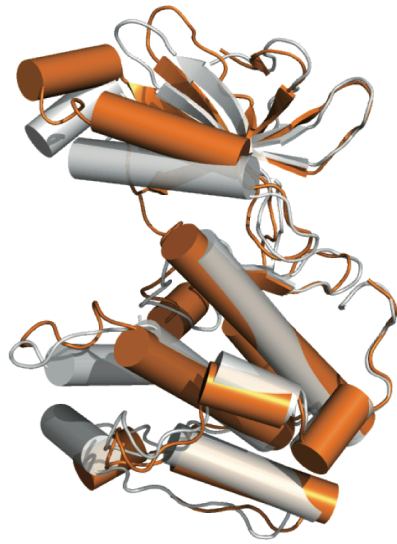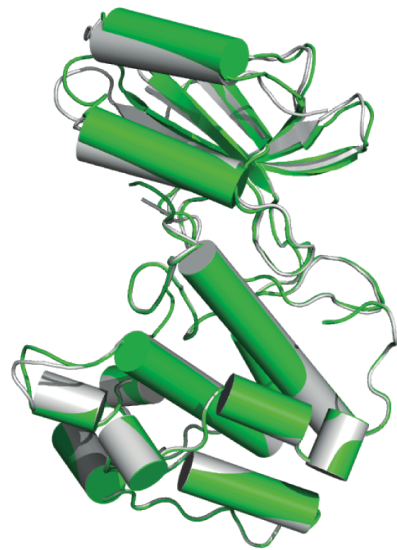

Supplementary Figure 3

PAK1 Inactive

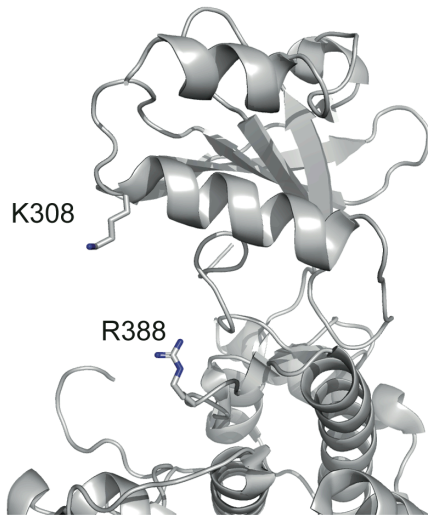

PAK1 Active

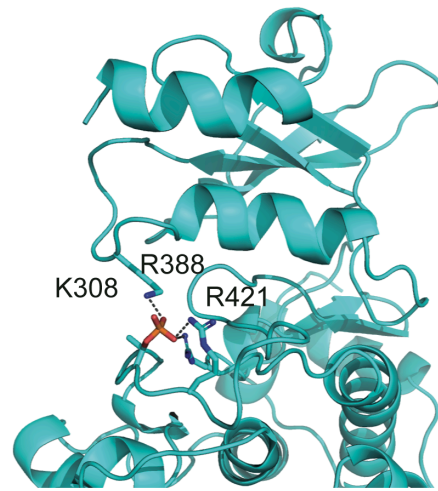

OST1 Inactive

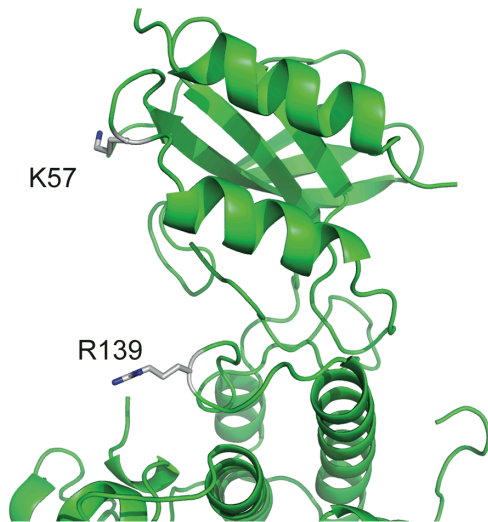

|                      |     |                   |     |
|----------------------|-----|-------------------|-----|
| <b>SnRK 2.6/OST1</b> | 49  | VKYIERGEKIDENVKRE | 65  |
| <b>SnRK 2.2</b>      | 51  | VKYIERGEKIDENVQRE | 67  |
| <b>SnRK 2.3</b>      | 50  | VKYIERGDKIDENVQRE | 66  |
| <b>SnRK 2.8</b>      | 32  | VKFIERGQKIDEHVQRE | 49  |
| <b>SnRK 2.7</b>      | 32  | VKYIERGLKIDEHVQRE | 49  |
| <b>SnRK 2.1</b>      | 32  | MKYIERGRKIDENVARE | 49  |
| <b>SnRK 2.5</b>      | 32  | MKYIERGRKIDENVARE | 49  |
| <b>SnRK 2.4</b>      | 32  | MKYIERGPKIDENVARE | 49  |
| <b>SnRK 2.10</b>     | 32  | MKYIERGPKIDENVARE | 49  |
| <b>SnRK 2.9</b>      | 32  | VKFIDRGYKIDENVARE | 49  |
| <b>PAK1</b>          | 301 | MNLQQQPKKELIINEIL | 317 |

Supplementary Figure 4

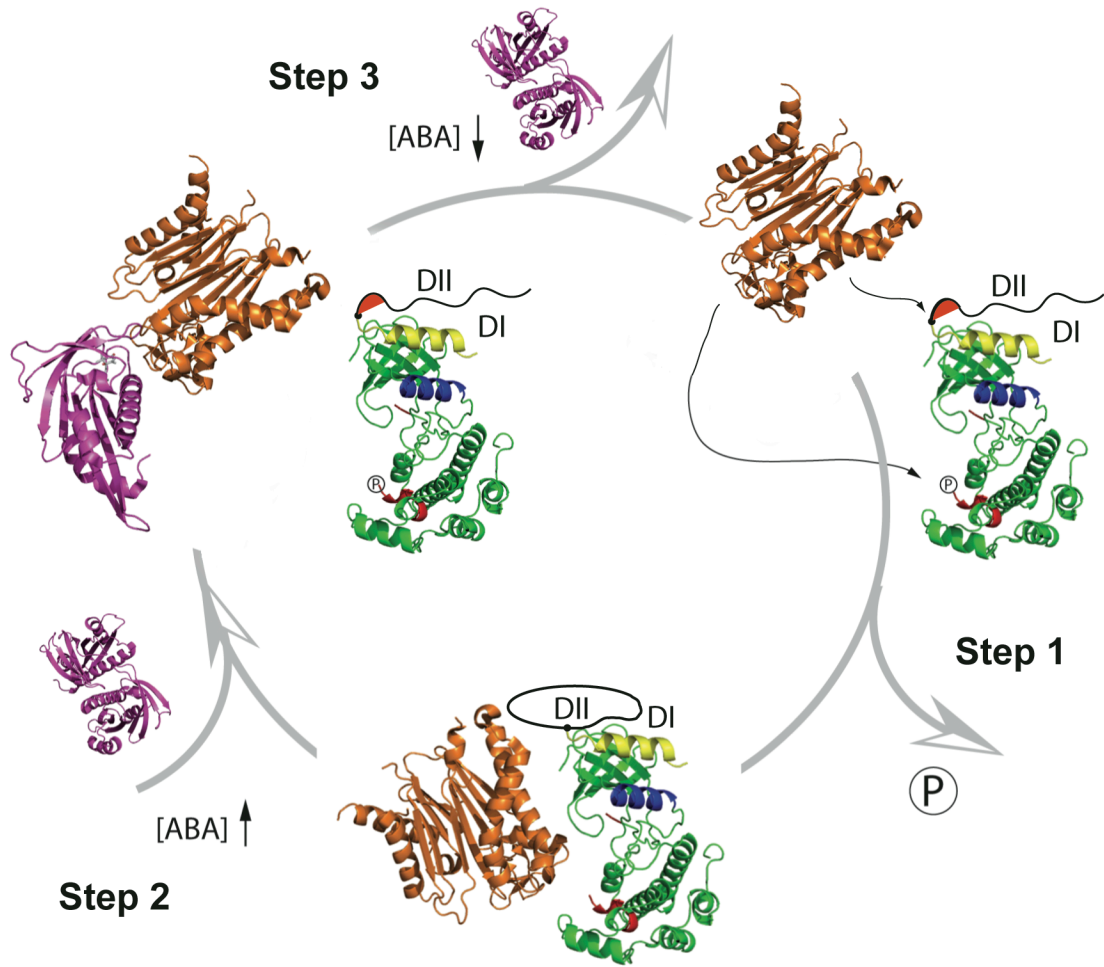

Supplementary Figure 5

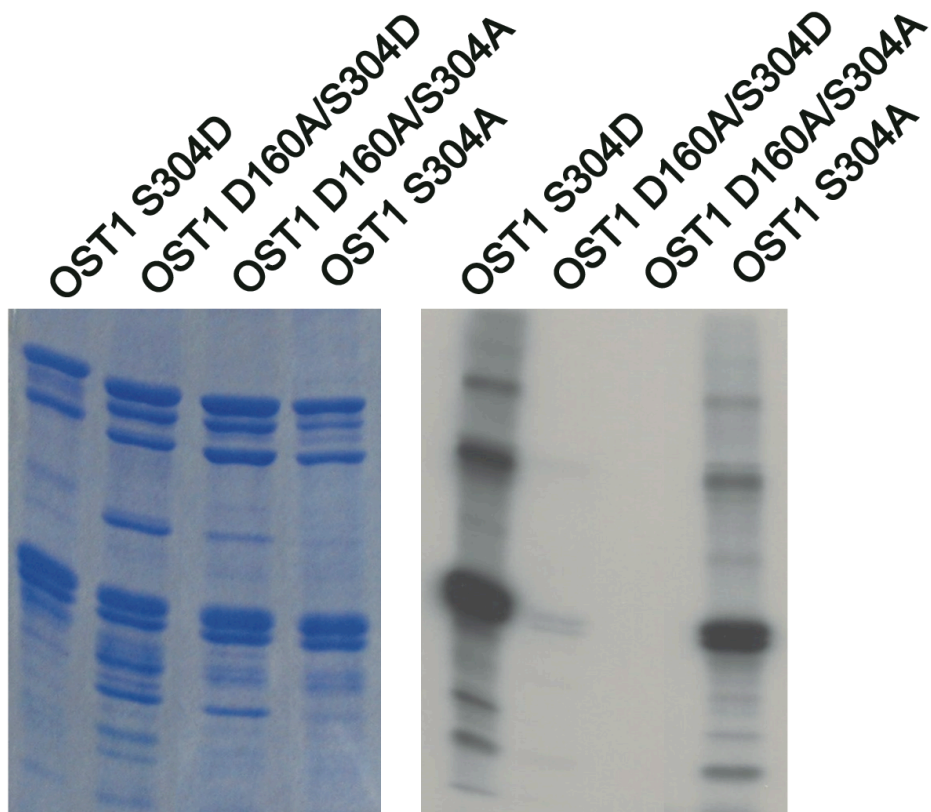

Supplementary Figure 6
